# Supplementary material for: Point-of-Care Lateral Flow Detection of Viable Escherichia coli O157:H7 Using an Improved Propidium Monoazide-Recombinase Polymerase Amplification Method
Source: MDPI journal article supplement (doi:10.3390/foods11203207), 2022-10-14
Supplement: s1 [file s1]

## Supplementary Document

# Point-of-Care Lateral Flow Detection of Viable *Escherichia coli* O157:H7 Using an Improved Propidium Monoazide-Recombinase Polymerase Amplification Method

Alka Rani <sup>1,\*</sup>, Charles Chinyere Dike <sup>1</sup>, Nitin Mantri <sup>2,3</sup> and Andrew Ball <sup>1</sup>

<sup>1</sup> ARC Training Centre for the Transformation of Australia's Biosolids Resource, School of Science, RMIT University, Bundoora West, VIC 3083, Australia

<sup>2</sup> The Pangenomics Lab, School of Science, RMIT University, Melbourne, VIC 3083, Australia

<sup>3</sup> The UWA Institute of Agriculture, The University of Western Australia, Perth, WA 6009, Australia

\* Correspondence: s3703623@student.rmit.edu.au; Tel.: +61-3-99-256594

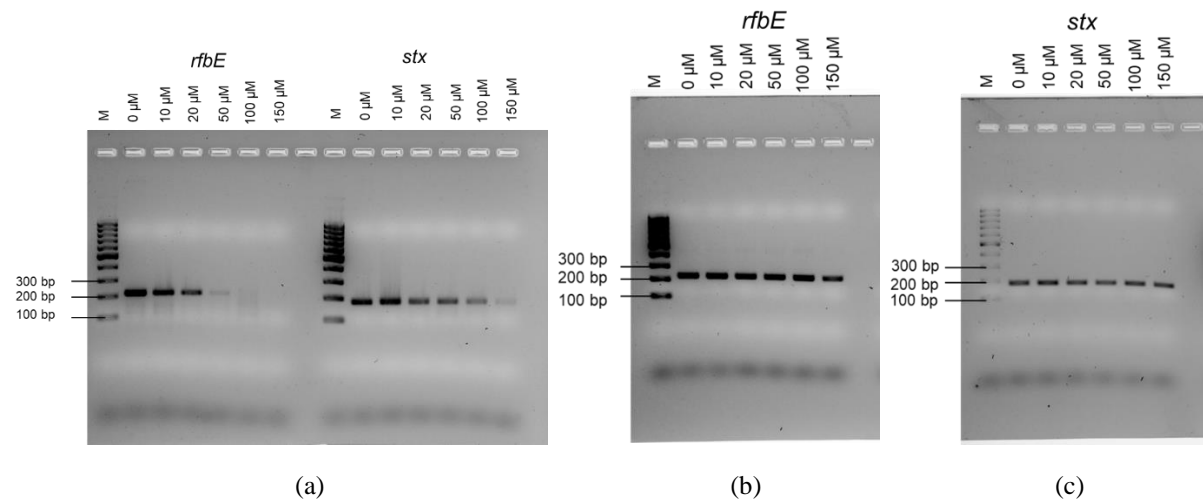

**Figure S1:** Raw data images for optimisation of the PMAxx-Recombinase Polymerase Assay (RPA) using PMAxx concentrations from 0 to 150  $\mu$ M. (a) Lane M: molecular marker, Lane 2 to 7: RPA amplified DNA from dead *E. coli* O157:H7 using *rfbE* F1/R1. Lane 10-15: RPA amplified DNA from dead *E. coli* O157:H7 using *stx* F1/R1. [b&c] PMAxx treated live *E. coli* O157:H7 cells; (b) using *rfbE* F1/R1, (c) using *stx* F1/R1.

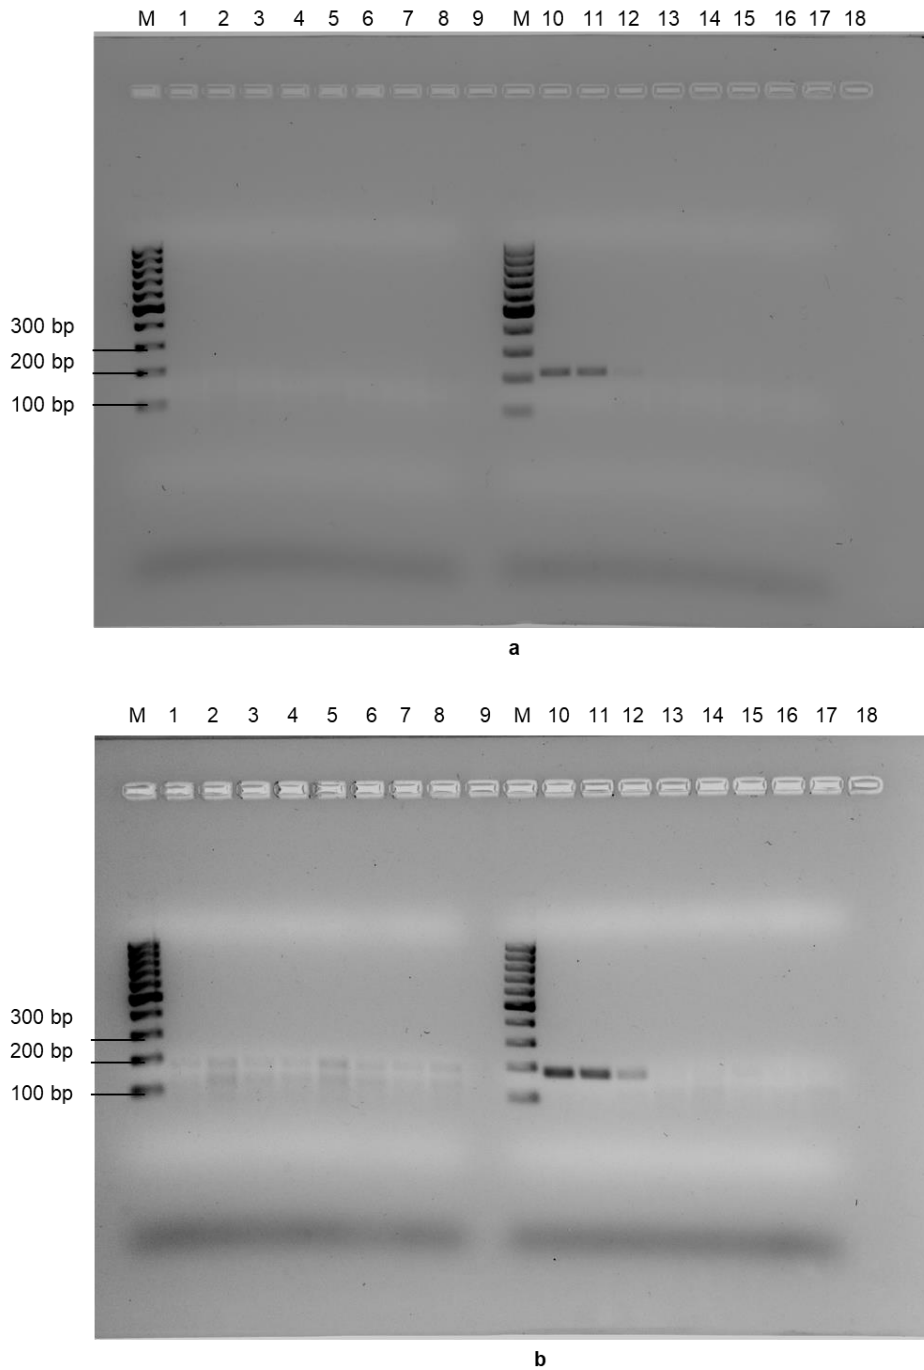

**Figure S2:** Agarose gel electrophoresis of the PMAxx-RPA assay using different concentrations of *E. coli* O157:H7. (a) targeting *rfbE* gene (b) targeting *stx* gene. Lane M: molecular marker; Lane 1-8: contains dead *E. coli* O157:H7 at concentration  $10^8$  CFU mL<sup>-1</sup>,  $10^7$  CFU mL<sup>-1</sup>,  $10^6$  CFU mL<sup>-1</sup>,  $10^5$  CFU mL<sup>-1</sup>,  $10^4$  CFU mL<sup>-1</sup>,  $10^3$  CFU mL<sup>-1</sup>,  $10^2$  CFU mL<sup>-1</sup>, and  $10^1$  CFU mL<sup>-1</sup>. Lane 10-18: contains live *E. coli* O157:H7 at concentration  $10^8$  CFU mL<sup>-1</sup>,  $10^7$  CFU mL<sup>-1</sup>,  $10^6$  CFU mL<sup>-1</sup>,  $10^5$  CFU mL<sup>-1</sup>,  $10^4$  CFU mL<sup>-1</sup>,  $10^3$  CFU mL<sup>-1</sup>,  $10^2$  CFU mL<sup>-1</sup>, and  $10^1$  CFU mL<sup>-1</sup>. PMAxx treatment was given at 100  $\mu$ M.

a

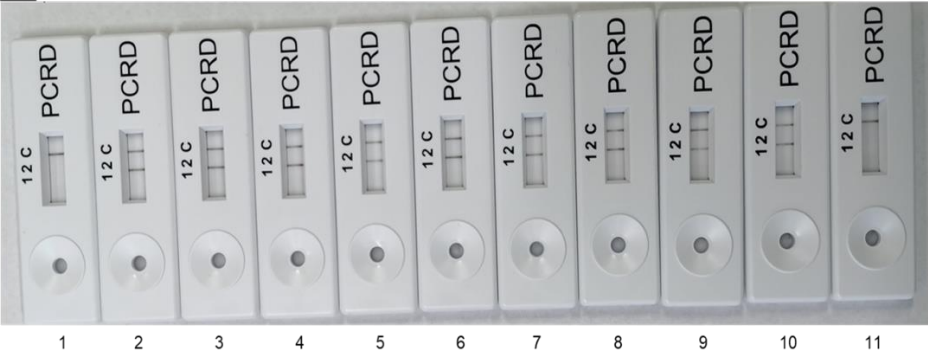

b

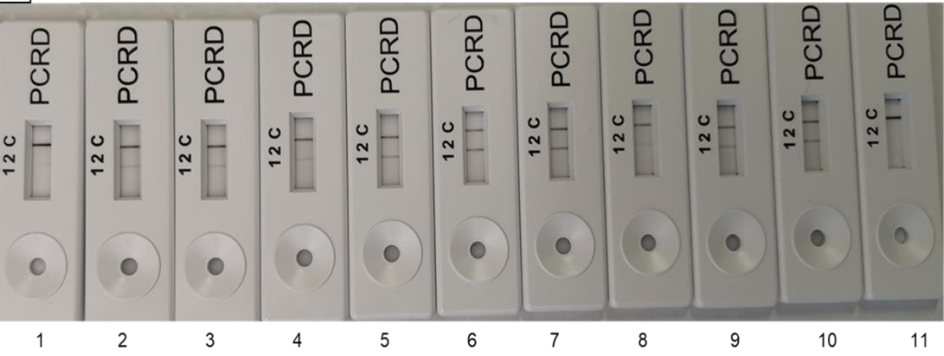

c

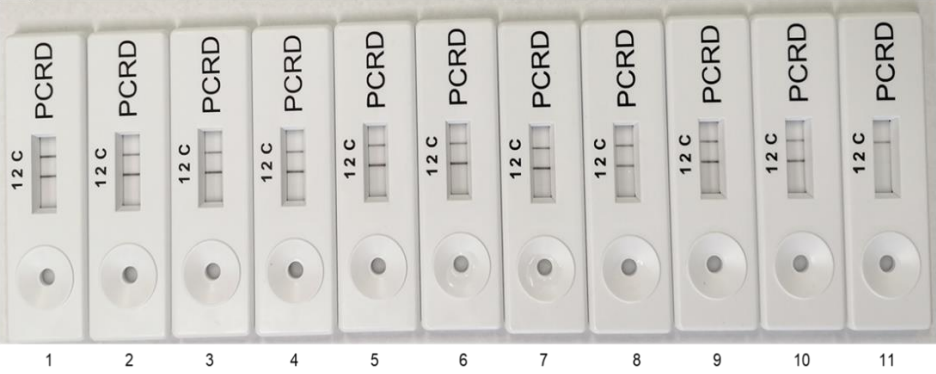

d

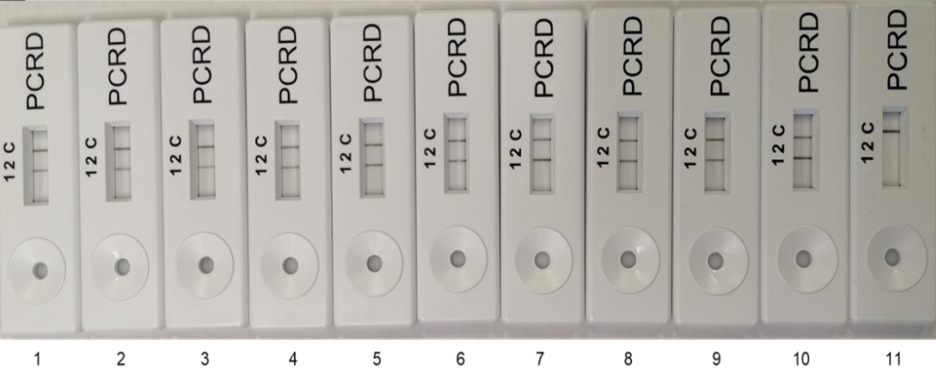

**Figure S3:** Validation of PMAXx- Recombinase Polymerase Assay-Lateral Flow Assay (RPA-LFA) for pure *E. coli* O157:H7 with different concentrations of live and dead cells. (a) and (b) represent the RPA-LFA targeting *rfbE* gene; (c) and (d) represent the RPA-LFA targeting *stx* gene. [a & c]- LFA 1 to 5 PMAXx treated *E. coli* O157:H7 with 0:100, 30:70, 50:50,70:30 ,100:0 live and dead cell ratio. LFA 6 to 10 show control reactions without PMAXx treatment with the same ratio of viable and dead *E. coli* O157:H7. LFA 11 contains NTC. [b & d]- LFA 1 to 5 PMAXx treated *E. coli* O157:H7 with  $10^2:10^8$ ,  $10^3:10^8$ ,  $10^4:10^8$ ,  $10^5:10^8$ ,  $10^6:10^8$ . LFA 6 to 10 show control reactions without PMAXx treatment with the same concentration of live and dead *E. coli* O157:H7  $10^2:10^8$ ,  $10^3:10^8$ ,  $10^4:10^8$ ,  $10^5:10^8$ ,  $10^6:10^8$ . LFA 11 contains NTC.

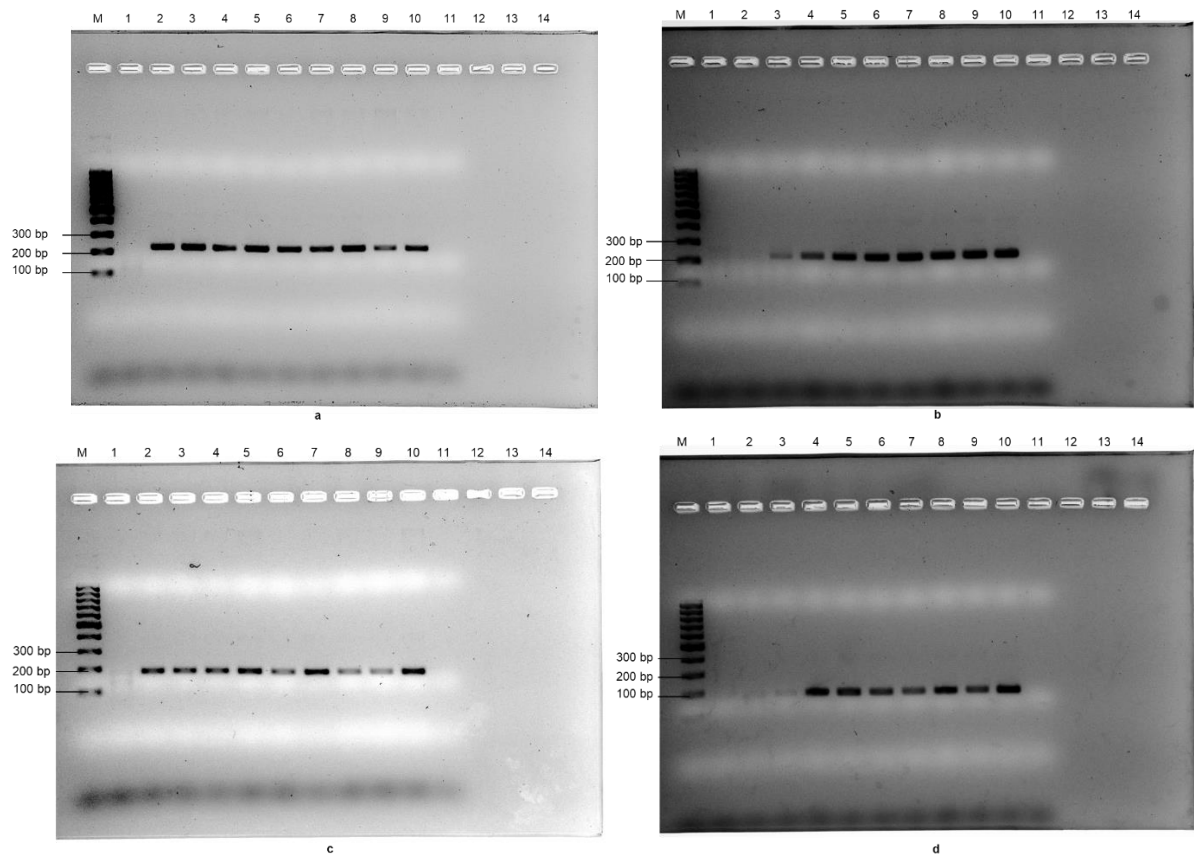

**Figure S4:** Agarose gel electrophoresis of PMAXx-RPA for pure *E. coli* O157:H7 with different concentrations of viable and dead cells. Image (a) and (b) are representing the RPA assay targeting the *rfbE* gene; image (c) and (d) represent the RPA assay targeting the *stx* gene. [a & c]- lane 1 to 5: PMAXx treated *E. coli* O157:H7 with 0:100, 30:70, 50:50,70:30 ,100:0 viable and dead ratio. Lane 6 to 10 show control reactions without PMAXx treatment with the same ratio of viable and dead *E. coli* O157:H7. Lane 11 contains NTC. Lane M: 100 bp molecular marker. [b & d]- Lane 1 to 5 PMAXx treated *E. coli* O157:H7 with  $10^2:10^8$ ,  $10^3:10^8$ ,  $10^4:10^8$ ,  $10^5:10^8$ ,  $10^6:10^8$ . Lane 6 to 10 show control reactions without PMAXx treatment with the same concentrations of viable and dead *E. coli* O157:H7  $10^2:10^8$ ,  $10^3:10^8$ ,  $10^4:10^8$ ,  $10^5:10^8$ ,  $10^6:10^8$ . Lane 11 contains NTC.

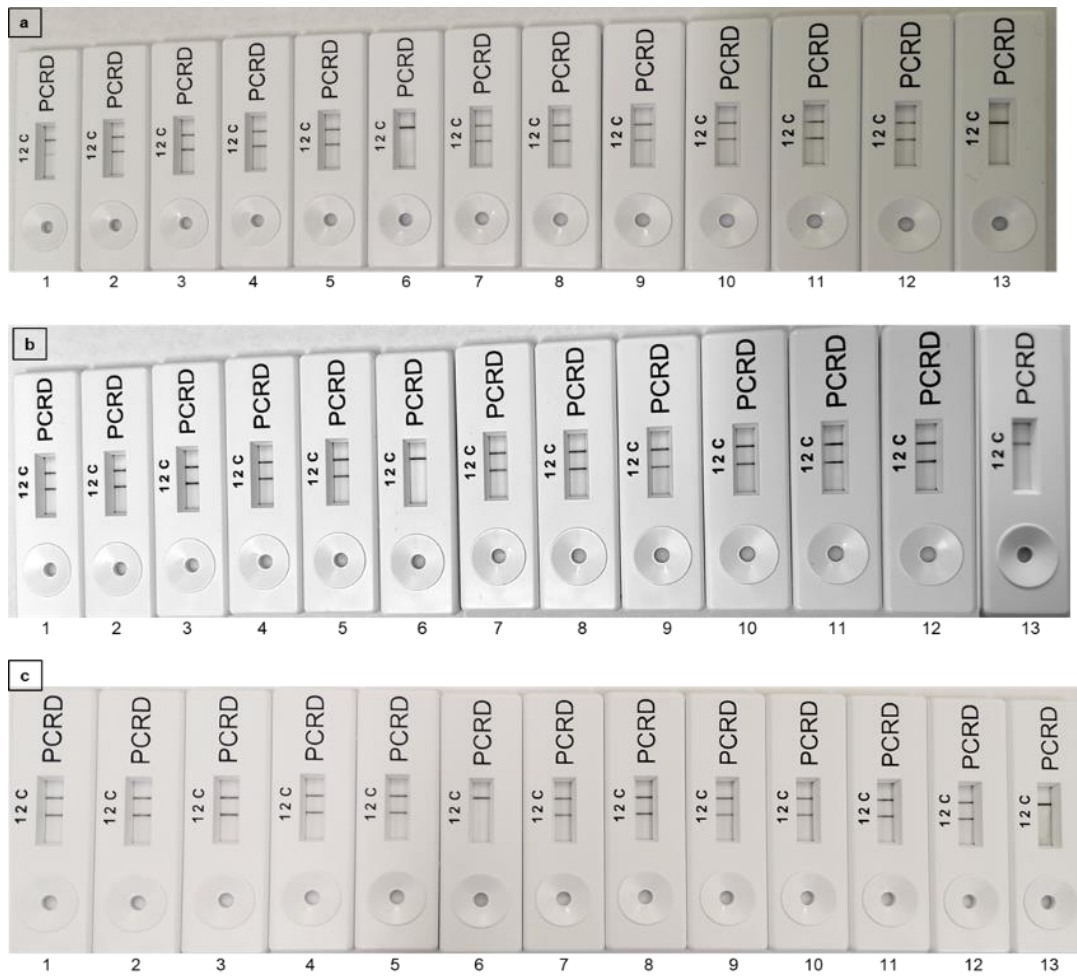

**Figure S5:** Validation of PMAx- Recombinase Polymerase Assay-Lateral Flow Assay (RPA-LFA) using the *rfbE* gene for commercial beverage samples spiked with different concentrations of live and dead cells, (a) milk samples; (b) water; (c) apple juice. LFA 1 to 6 PMAx treated *E. coli* O157:H7 with  $10^2:10^8$ ,  $10^3:10^8$ ,  $10^4:10^8$ ,  $10^5:10^8$ ,  $10^6:10^8$ ,  $0:10^8$ , live:dead ratio, respectively. Lanes 7 to 12 show control reactions without PMAx treatment with the same concentration of viable and dead *E. coli* O157:H7. Lane 13 shows NTC.

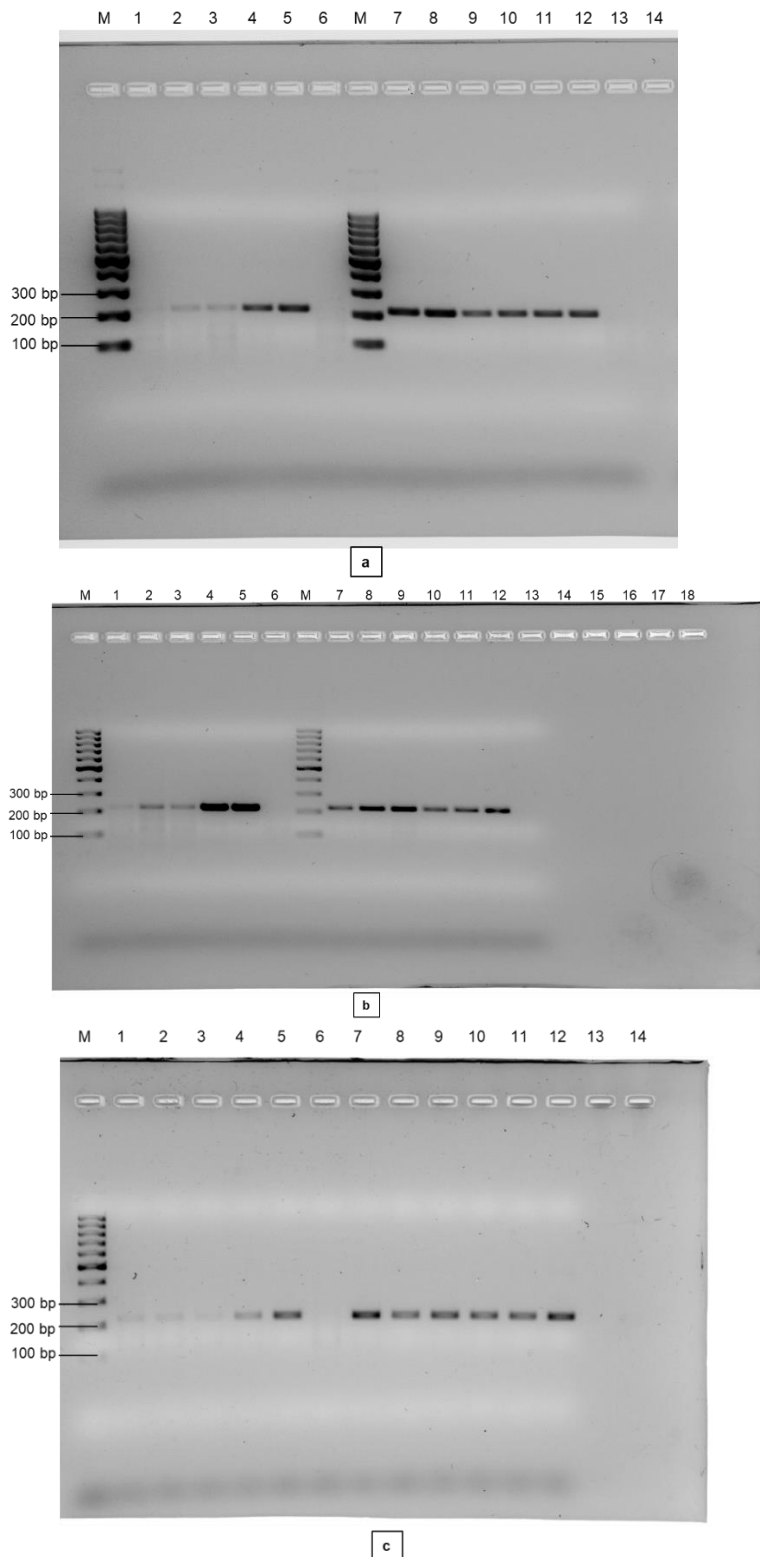

**Figure S6:** Agarose gel electrophoresis of PMAxx-RPA for commercial beverage samples spiked with varying concentrations of viable and dead cells, (A) milk samples; (B) water; (C) apple juice. Lane M: 100 bp molecular marker, Lane 2 to 6 PMA treated *E. coli* O157:H7 with  $10^2:10^8$ ,  $10^3:10^8$ ,  $10^4:10^8$ ,  $10^5:10^8$ ,  $10^6:10^8$ ,  $0:10^8$  live and dead. Lanes 7 to 12 show control reactions without PMA treatment with the same concentrations of viable and dead *E. coli* O157:H7  $10^2:10^8$ ,  $10^3:10^8$ ,  $10^4:10^8$ ,  $10^5:10^8$ ,  $10^6:10^8$ . Lane 13 contains NTC.

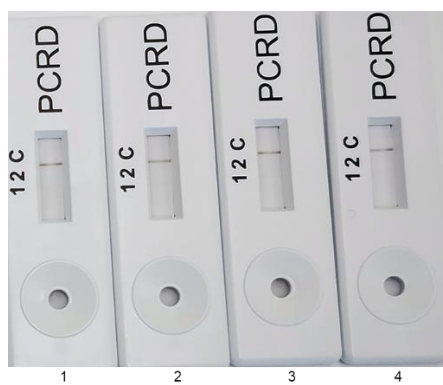

**Figure S7:** Effect of pH on PMAxx- RPA-LFA for the detection of dead *E. coli* O157:H7. LFA 1: pH 3; LFA 2: pH 5; LFA 3: pH 7; LFA 4: pH 11.



Table S1 Summary of PMAxx- Recombinase Polymerase Assay-Lateral Flow Assay (RPA-LFA) results using different ratios and concentrations of Live:Dead *Escherichia coli* O157:H7 and viable but non-culturable cells (VBNC)

a)

| PMAxx-RPA-LFA<br>Live:Dead (CFU/mL) | Gene target<br><i>rfbE</i> | Gene target<br><i>stx</i> |
|-------------------------------------|----------------------------|---------------------------|
| (0: 10 <sup>8</sup> )               | ✗                          | ✓                         |
| (0: 10 <sup>7</sup> )               | ✗                          | ✓                         |
| (0: 10 <sup>6</sup> )               | ✗                          | ✓                         |
| (0: 10 <sup>5</sup> )               | ✗                          | ✓                         |
| (0: 10 <sup>4</sup> )               | ✗                          | ✓                         |
| (0: 10 <sup>3</sup> )               | ✗                          | ✓                         |
| (0: 10 <sup>2</sup> )               | ✗                          | ✓                         |
| (0: 10 <sup>1</sup> )               | ✗                          | ✓                         |
| (10 <sup>8</sup> :0)                | ✓                          | ✓                         |
| NTC                                 | ✗                          | ✗                         |

b)

| RPA-LFA<br>Live:Dead ratio<br>(each 10 <sup>8</sup> CFU/mL) | PMAxx<br>treatment<br>( <i>rfbE</i><br>primers) | No<br>treatment<br>( <i>rfbE</i><br>primers) | PMAxx<br>treatment<br>( <i>stx</i><br>primers) | No treatment<br>( <i>stx</i> primers) |
|-------------------------------------------------------------|-------------------------------------------------|----------------------------------------------|------------------------------------------------|---------------------------------------|
| 0:100                                                       | ✗                                               | ✓                                            | ✓                                              | ✓                                     |
| 30:70                                                       | ✓                                               | ✓                                            | ✓                                              | ✓                                     |
| 50:50                                                       | ✓                                               | ✓                                            | ✓                                              | ✓                                     |
| 70:30                                                       | ✓                                               | ✓                                            | ✓                                              | ✓                                     |
| 100:0                                                       | ✓                                               | ✓                                            | ✓                                              | ✓                                     |
| NTC                                                         | ✗                                               | ✗                                            | ✗                                              | ✗                                     |

c)

| RPA-LFA<br>Live:Dead (CFU/mL)       | PMAxx<br>treatment<br>( <i>rfbE</i><br>primers) | No<br>treatment<br>( <i>rfbE</i><br>primers) | PMAxx<br>treatment<br>( <i>stx</i><br>primers) | No treatment<br>( <i>stx</i> primers) |
|-------------------------------------|-------------------------------------------------|----------------------------------------------|------------------------------------------------|---------------------------------------|
| (10 <sup>2</sup> :10 <sup>8</sup> ) | ✓                                               | ✓                                            | ✓                                              | ✓                                     |
| (10 <sup>3</sup> :10 <sup>8</sup> ) | ✓                                               | ✓                                            | ✓                                              | ✓                                     |
| (10 <sup>4</sup> :10 <sup>8</sup> ) | ✓                                               | ✓                                            | ✓                                              | ✓                                     |
| (10 <sup>5</sup> :10 <sup>8</sup> ) | ✓                                               | ✓                                            | ✓                                              | ✓                                     |
| (10 <sup>6</sup> :10 <sup>8</sup> ) | ✓                                               | ✓                                            | ✓                                              | ✓                                     |
| NTC                                 | ✗                                               | ✗                                            | ✗                                              | ✗                                     |

✗: No coloured band at test line (negative); ✓: coloured band at test line (positive); NTC: non-template control

Table S2 PMA<sub>xx</sub>-RPA-LFA outcomes in spiked commercial samples

a)

| PMA <sub>xx</sub> -RPA-LFA<br>Live:Dead (CFU/mL) | Milk | Water | Apple juice |
|--------------------------------------------------|------|-------|-------------|
| (10 <sup>2</sup> :10 <sup>8</sup> )              | ✓    | ✓     | ✓           |
| (10 <sup>3</sup> :10 <sup>8</sup> )              | ✓    | ✓     | ✓           |
| (10 <sup>4</sup> :10 <sup>8</sup> )              | ✓    | ✓     | ✓           |
| (10 <sup>5</sup> :10 <sup>8</sup> )              | ✓    | ✓     | ✓           |
| (10 <sup>6</sup> :10 <sup>8</sup> )              | ✓    | ✓     | ✓           |
| (0:10 <sup>8</sup> )                             | ✗    | ✗     | ✗           |
| NTC                                              | ✗    | ✗     | ✗           |

b)

| PMA <sub>xx</sub> -RPA-LFA<br>VBNC (CFU/mL) | Milk | Water | Apple juice | Pure culture |
|---------------------------------------------|------|-------|-------------|--------------|
| 10 <sup>2</sup>                             | ✓    | ✓     | ✓           | ✓            |
| 10 <sup>3</sup>                             | ✓    | ✓     | ✓           | ✓            |
| 10 <sup>4</sup>                             | ✓    | ✓     | ✓           | ✓            |
| 10 <sup>5</sup>                             | ✓    | ✓     | ✓           | ✓            |
| 10 <sup>6</sup>                             | ✓    | ✓     | ✓           | ✓            |
| NTC                                         | ✗    | ✗     | ✗           | ✗            |

✗: No colored band at test line (negative); ✓: colored band at test line (positive); NTC: non-template control; VBNC: viable but non culturable

Table S3 The unmodified primers for *E. coli* O157:H7 targeting *rfbE* and *stx* gene used for PMA<sub>xx</sub>-RPA-EF assay

| Assay Type | Gene Target | Primer s    | Sequence (5'-3')                   | Primer length (bp) | Amplicon size (bp) | References |
|------------|-------------|-------------|------------------------------------|--------------------|--------------------|------------|
| RPA-<br>EF | rfbE        | Eco rfbE F1 | AGCTTTGTTAGCGTTAGGTATATCGGAA GGAGA | 33                 | 216                | [34]       |
|            |             | Eco rfbE R1 | ACATGGATGTCCGTATAAATGGACACAC ATAAT | 33                 |                    |            |
|            | stx         | Eco stx2 F1 | GTGGCCGGGTTTCGTTAATACGGCAACAA ATAC | 32                 | 179                |            |
|            |             | Eco stx2 R1 | TGAAACCAGTGAGTGACGACTGATTTGC ATTC  | 32                 |                    |            |

PMAXx- Propidium monoazide, RPA- recombinase polymerase amplification, EF- electrophoresis.

Table S4 The modified primers and probes for *E. coli* O157:H7 targeting the *rfbE* and *stx* gene used for PMAXx-RPA-LFA.

| Assay Type | Gene target | Primers           | Sequence (5'-3')                                                                                                | Primer length (bp) | Amplicon size (bp) | References |
|------------|-------------|-------------------|-----------------------------------------------------------------------------------------------------------------|--------------------|--------------------|------------|
| RPA - LFA  | <i>rfbE</i> | Eco rfbE F1       | AGCTTTGTTAGCGTTAGGTATATCGGAAG GAGA                                                                              | 33                 | 216                | [34]       |
|            |             | Eco rfbE R1       | <b>Bt-</b> ACATGGATGTCCGTATAAATGGACACACA TAAT                                                                   | 33                 |                    |            |
|            |             | Eco rfbE P1 probe | <b>5'-FAM-</b> GTTGATTGAGATAATGAACTTGGCAAAT GT-( <b>THFresidue</b> ) TGTTAGTGACATAGAAC- <b>C3spacer-3'</b>      | 48                 |                    |            |
| RPA - LFA  | <i>Stx</i>  | Eco stx2 F1       | 5'- GTGGCCGGGTTCGTTAATACGGCAACAAA TAC – 3'                                                                      | 32 nt              | 179                |            |
|            |             | Eco stx2 R1       | 5'- Biotin- TGAAACCAGTGAGTGACGACTGATTTGCA TTC – 3'                                                              | 32 nt              |                    |            |
|            |             | Eco stx2 P1 probe | <b>5'- FAM-</b> AGTGCCCGGTGTGACAACGGTTTCCATGA CAA( <b>THF residue</b> )GGACAGCAGTTATACCA - <b>C3spacer – 3'</b> | 49                 |                    |            |

PMAXx- Propidium monoazide, RPA- recombinase polymerase amplification, LFA- lateral flow assay

Rani, A., et al., *Evaluation and comparison of recombinase polymerase amplification coupled with lateral-flow bioassay for Escherichia coli O157: H7 detection using different genes*. Scientific reports, 2021. **11**(1): p. 1-12.
